# Supplementary material for: Research interest and activity among medical students in Gothenburg, Sweden, a cross-sectional study
Source: PubMed Central journal article supplement (PMC5002212; doi:10.1186/s12909-016-0749-3), 2016-08-26
Supplement: 12909_2016_749_MOESM3_ESM.pdf [file 12909_2016_749_MOESM3_ESM.pdf]

## Number of Swedish PhD degrees per year in medicine\* 2000-2012

| Calendar year | Number of awarded PhDs | Number awarded PhDs holding an MD |
|---------------|------------------------|-----------------------------------|
| 2000          | 664                    | 295                               |
| 2001          | 656                    | 264                               |
| 2002          | 687                    | 265                               |
| 2003          | 721                    | 260                               |
| 2004          | 744                    | 237                               |
| 2005          | 780                    | 249                               |
| 2006          | 811                    | 266                               |
| 2007          | 749                    | 252                               |
| 2008          | 760                    | 240                               |
| 2009          | 826                    | 256                               |
| 2010          | 821                    | 290                               |
| 2011          | 758                    | 265                               |
| 2012          | 687                    | 239                               |

Source: Statistics Sweden (SCB); Educational Register (UREG).

Contact: Michael Karlsson (michael.karlsson@scb.se; tel.: +4619-17 64 81).

\* Category #721 according to the SUN 2000-nomenclature

## Number of Swedish medical licenses issued per year 2000-2012

| Calendar year | Number of medical licenses issued | Ratio of PhD/MD per issued medical licenses |
|---------------|-----------------------------------|---------------------------------------------|
| 2000          | 1185                              | 0,25                                        |
| 2001          | 1329                              | 0,20                                        |
| 2002          | 1470                              | 0,18                                        |
| 2003          | 1697                              | 0,15                                        |
| 2004          | 1868                              | 0,13                                        |
| 2005          | 1808                              | 0,14                                        |
| 2006          | 1946                              | 0,14                                        |
| 2007          | 2211                              | 0,11                                        |
| 2008          | 2024                              | 0,12                                        |
| 2009          | 1956                              | 0,13                                        |
| 2010          | 1987                              | 0,15                                        |
| 2011          | 2123                              | 0,12                                        |
| 2012          | 2186                              | 0,11                                        |

Source: National Board of Health and Welfare (Socialstyrelsen).

Contact: Birgitta Ollars (birgitta.ollars@socialstyrelsen.se; tel.: +4675-247 38 29).
